# Supplementary material for: Integrated Treatment at Laboratory Scale of a Mature Landfill Leachate via Active Filtration and Anaerobic Digestion: Preliminary Results
Source: MDPI journal article supplement (doi:10.3390/w13202845), 2021-10-13
Supplement: s1 [file s1]

# Integrated Treatment at Laboratory Scale of a Mature Landfill Leachate via Active Filtration and Anaerobic Digestion: Preliminary Results

*Filippo Fazzino, Stefania Bilardi, Nicola Moraci, Paolo S. Calabrò*

*Università Degli Studi Mediterranea di Reggio Calabria, Department of Civil, Energy, Environmental and Materials Engineering, Via Graziella, Loc. Feo di Vito, 89122, Reggio Calabria, Italy*

## Supplementary information

*Table S1. Coefficient of uniformity, mean grain size and particle density of materials*

| Parameter              | ZVI  | Lapillus | GAC   |
|------------------------|------|----------|-------|
| U                      | 2.0  | 3.3      | 1.45  |
| d <sub>50</sub> [mm]   | 0.5  | 0.4      | 0.6   |
| ρ [g/cm <sup>3</sup> ] | 7.87 | 2.2      | < 1.0 |

*Table S2. Inoculum and substrate characterisation*

|           | Total Solids<br>TS (%) | Volatile Solids<br>VS (%TS) | pH   | COD [mg/g] |
|-----------|------------------------|-----------------------------|------|------------|
| Inoculum  | 6.1%                   | 76.4%                       | 7.65 | -          |
| Cellulose | 94.9%                  | 100.0%                      | -    | 1185*      |

\*estimated from stoichiometry

*Table S3. pH values in MLL samples withdrawn from column tests*

| Day | ZVI/lapillus |       |       | ZV/GAC |       |       |
|-----|--------------|-------|-------|--------|-------|-------|
|     | 5 cm         | 28 cm | 50 cm | 5 cm   | 28 cm | 50 cm |
| 3   | 8.13         | 8.32  | 8.26  | 8.33   | 7.52  | 6.10  |
| 7   | 8.00         | 7.92  | 7.96  | 8.15   | 8.40  | 8.39  |

*Table S1. TS content in weekly collected digestates*

| Week | TS (%) |      |      |      |
|------|--------|------|------|------|
|      | A      | B    | C    | D    |
| I    | 3.6%   | 3.6% | 3.6% | 3.7% |
| II   | 2.5%   | 2.4% | 2.5% | 2.5% |
| III  | 1.2%   | 1.5% | 1.4% | 1.1% |
| IV   | 1.6%   | 1.3% | 1.2% | 1.2% |
| V    | 1.4%   | 1.0% | 1.1% | 1.0% |
| VI   | 0.8%   | 0.6% | 0.6% | 0.6% |

*Table S2. VS content in weekly collected digestates*

| Week | VS (%TS) |       |       |       |
|------|----------|-------|-------|-------|
|      | A        | B     | C     | D     |
| I    | 71.0%    | 74.7% | 74.5% | 74.8% |
| II   | 73.2%    | 76.0% | 77.2% | 77.4% |
| III  | 75.0%    | 81.5% | 75.9% | 73.4% |
| IV   | 59.3%    | 60.8% | 55.3% | 59.2% |
| V    | 45.0%    | 47.1% | 38.0% | 43.9% |
| VI   | 45.2%    | 52.5% | 30.6% | 49.6% |

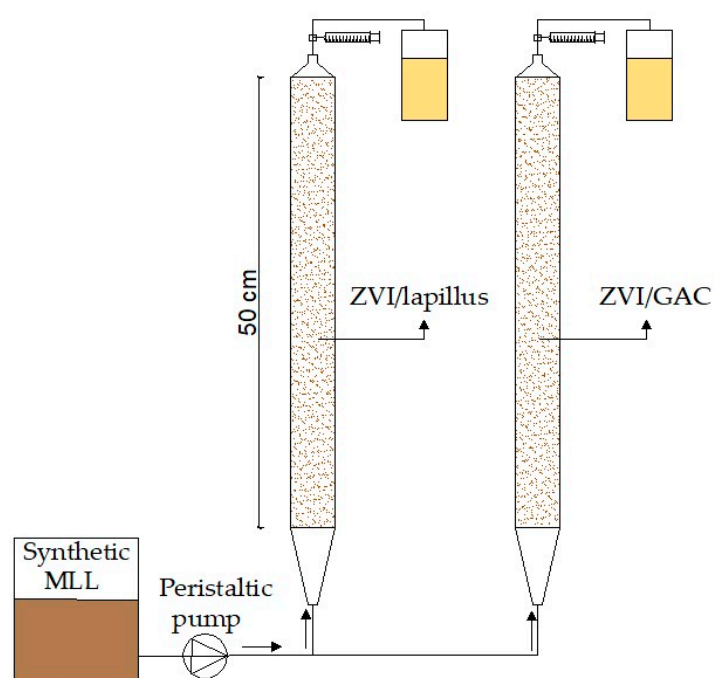

Figure S1: experimental apparatus for leachate pre-treatment

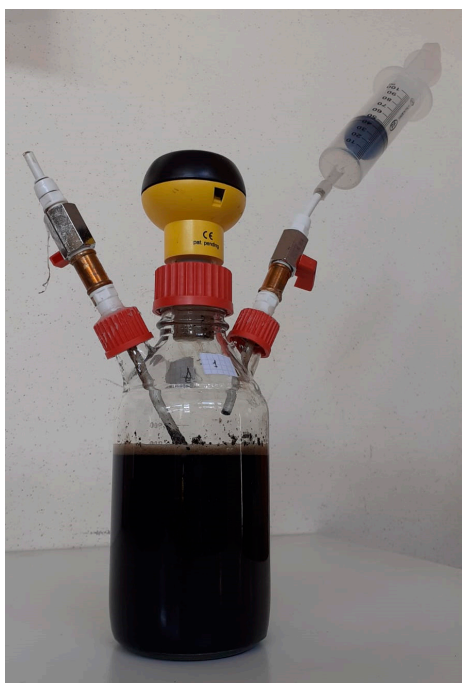

Figure S2. Semi-continuous anaerobic reactor
